# Supplementary material
Source: PubMed Central journal article supplement (PMC2732286)
Supplement: en.2008-1250_1.pdf [file en.2008-1250_1.pdf]

---

## Sequences of primers and probes

---

### Primers genotyping

|              |                       |
|--------------|-----------------------|
| GPR39WT (G1) | GCATGCCCATGGAGTTCTAC  |
| GPR39WT (G3) | AGATGCTGGACTGGAAGACC  |
| FmNEO (G2)   | GATCGATCCGTCCTGTAAGTC |

---

### Primers for QPCR

|                   |                       |
|-------------------|-----------------------|
| FmrhYWHAZ         | AGACGGAAGGTGCTGAGAAA  |
| RmrhYWHAZ         | GAAGCATTGGGGATCAAGAA  |
| FmrhB-actin       | TTCTACAATGAGCTGCGTGTG |
| RmrhB-actin       | GGGGTGTGAAGGTCTCAA    |
| FmrGPR39-1a       | AGTGAGGAGAGCCGACAG    |
| RmrGPR39-1a       | CAGTCATGTTTGGGTTTTGC  |
| FmrGLUT2          | CCAGCCTGTGTATGCAACC   |
| RmrGLUT2          | TCCACAAGCAGCACAGAGAC  |
| FmrGPR40          | GAAGGCTCCTGGAGGAAGTT  |
| RmrGPR40          | CCAGTTCAGCGGCGGGGTTT  |
| FmrGKC            | GCAGAAGGGAACAACATCGT  |
| FmrGKC            | TCACATTGGCGGTCTTCATA  |
| FmrHNF-1 $\alpha$ | GGCCATGGACACCTATAACG  |
| RmrHNF-1 $\alpha$ | GTACCGTACACCGTGGACCT  |
| FmPDx1            | GAGGACCCGTA CTGCCTACA |
| RmrPDx1           | GGCCGGGAGATGTATTTGTT  |
| FmInsulin1/2      | GTGAAGTGGAGGCCACAA    |
| RmInsulin1/2      | CAGCTGGTAGAGGGAGCAGA  |
| FmGPR39KO         | CTTTGCCATGGGTATCGAGT  |
| RmrGPR39KO        | CGTGCAGATGGACATATTGG  |

---

### Probes for TaqMan assays

|              |                                         |
|--------------|-----------------------------------------|
| QPmrhYWHAZ   | (HEX)AGA+TG+GC+TC+GA+GA+AT+ACA (BHQ1)   |
| QPmrhB-actin | (HEX)TGA+T+C+TGGG+T+CA+T+CTT (BHQ1)     |
| QPmrGPR39-1a | (6Fam)CAGA+CCAT+CAT+ATT+CCTG (BHQ1)     |
| QPmGPR39KO   | (6Fam)TTC+CAG+GTTT+CAT+CGT+GGTG (BHQ1)  |
| QPmrGLUT2    | (6Fam)CATC+AA+CATGAT+CTT+CA+CGGC (BHQ1) |

---

F: forward, R: reverse, P: probe, m: mouse, r: rat, h: human, LNA moieties are indicated by + before the nucleotide.

---

---
