# Supplementary material
Source: PubMed Central journal article supplement (PMC2732286)
Supplement: en.2008-1250_2.pdf [file en.2008-1250_2.pdf]

| Littermates and exp pairs. | GPR39 +/+ Insulin (nM) | GPR39-/- Insulin (nM) | Absolute decrease (nM) | Relative decrease (%) | Culture days |
|----------------------------|------------------------|-----------------------|------------------------|-----------------------|--------------|
| Pair 1a                    | 31                     | 19                    | 12                     | 39                    | 5            |
| 1b                         | 26                     | 15                    | 11                     | 42                    |              |
| Pair 2                     | 71                     | 64                    | 7                      | 10                    | 3            |
| Pair 3                     | 13                     | 5.7                   | 7.3                    | 56                    | 5            |
