# Supplementary material
Source: PubMed Central journal article supplement (PMC2732286)

Mock

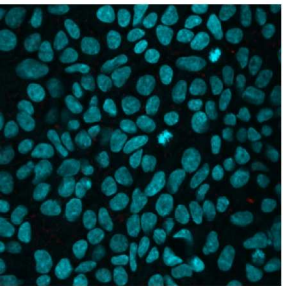

DAPI/Gpr39-1a

mGpr39-1a

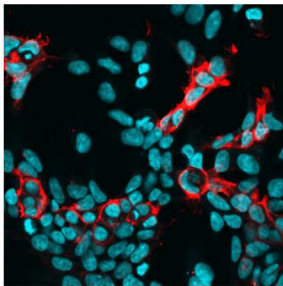

DAPI/Gpr39-1a

Supplement: en.2008-1250_3.pdf [file en.2008-1250_3.pdf]

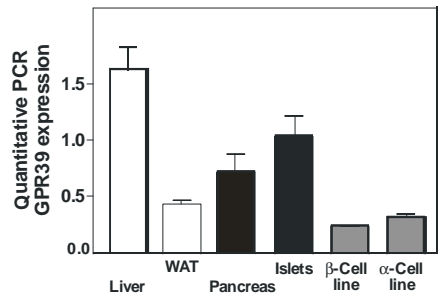

Supplement: en.2008-1250_4.pdf [file en.2008-1250_4.pdf]

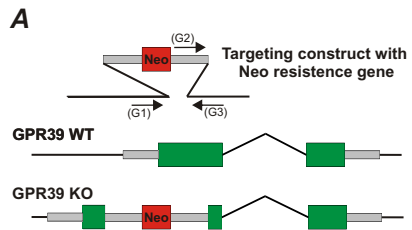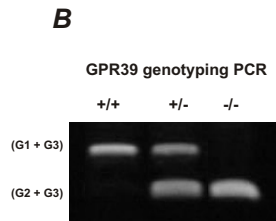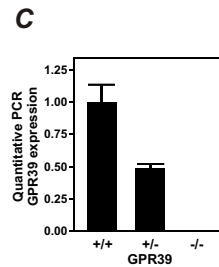

Supplement: en.2008-1250_5.pdf [file en.2008-1250_5.pdf]

Female

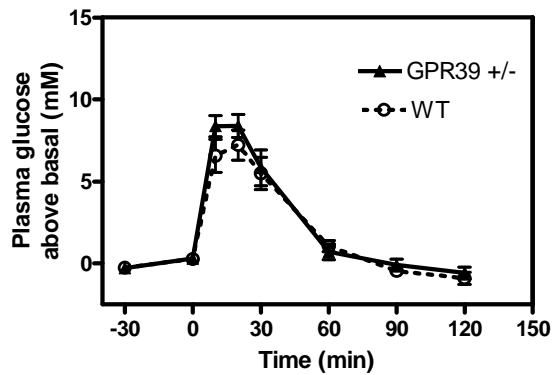

Male

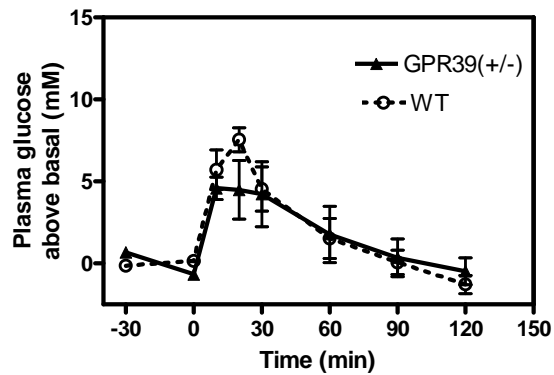

Supplement: en.2008-1250_6.pdf [file en.2008-1250_6.pdf]

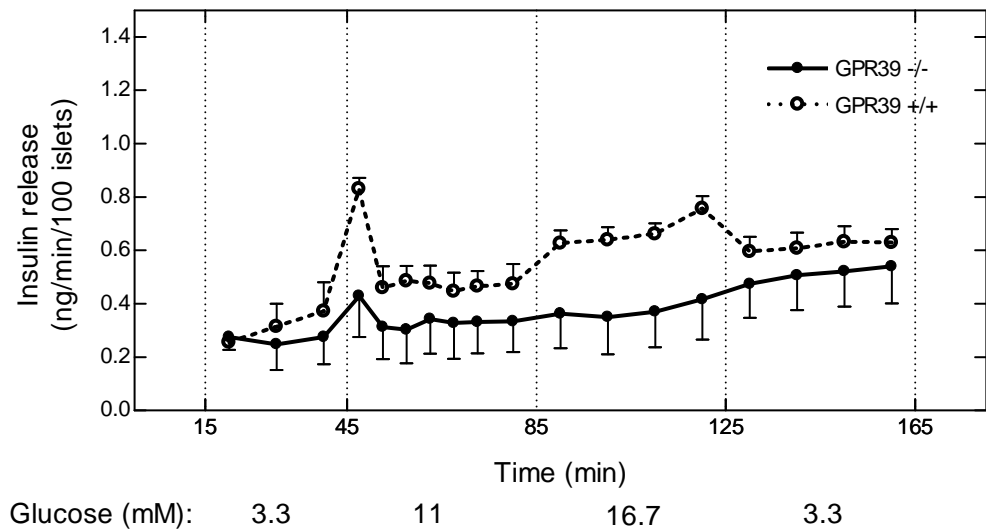

Supplement: en.2008-1250_7.pdf [file en.2008-1250_7.pdf]

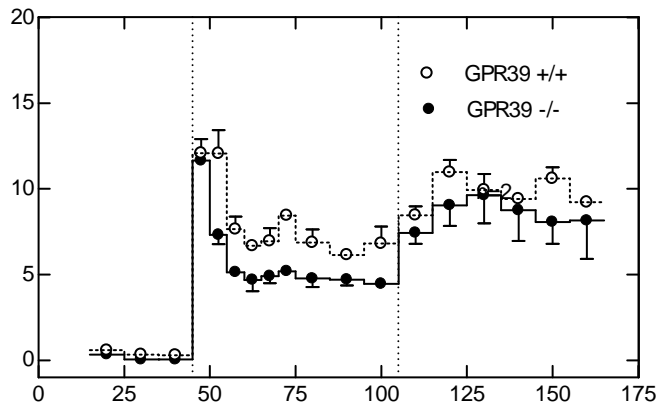

Glucose (mM):      3.3                      16.7                      16.7 + 0.1  $\mu$ M GLP-1

Supplement: en.2008-1250_8.pdf [file en.2008-1250_8.pdf]
